# Supplementary material for: Disparities in Screening and Treatment of Cardiovascular Diseases in Patients With Mental Disorders Across the World: Systematic Review and Meta-Analysis of 47 Observational Studies
Source: Atypon-hosted journal article supplement (doi:10.1176/appi.ajp.2021.21010031), 2021-07-14
Supplement: appi.ajp.2021.21010031.ds001.pdf [file appi.ajp.2021.21010031.ds001.pdf]

Data supplement for Solmi et al., Disparities in Screening and Treatment of Cardiovascular Diseases in Patients With Mental Disorders Across the World: Systematic Review and Meta-Analysis of 47 Observational Studies. *Am J Psychiatry* (doi: 10.1176/appi.ajp.2021.21010031)

## **CONTENTS**

Table S1. PRISMA checklist

Table S2. MOOSE checklist

Table S3. Characteristics of included studies

Table S4. The list of excluded meta-analyses by full text screening with exclusion reason

Table S5. Quality of included observational studies according to Newcastle-Ottawa Scale

Table S6. Country subgroup analyses

Table S7. Confounding by indication subgroup analyses.

**TABLE S1. PRISMA checklist (1)**

| Section/topic                      | #  | Checklist item                                                                                                                                                                                                                                                                                              | Reported on page # |
|------------------------------------|----|-------------------------------------------------------------------------------------------------------------------------------------------------------------------------------------------------------------------------------------------------------------------------------------------------------------|--------------------|
| <b>TITLE</b>                       |    |                                                                                                                                                                                                                                                                                                             |                    |
| Title                              | 1  | Identify the report as a systematic review, meta-analysis, or both.                                                                                                                                                                                                                                         | 1                  |
| <b>ABSTRACT</b>                    |    |                                                                                                                                                                                                                                                                                                             |                    |
| Structured summary                 | 2  | Provide a structured summary including, as applicable: background; objectives; data sources; study eligibility criteria, participants, and interventions; study appraisal and synthesis methods; results; limitations; conclusions and implications of key findings; systematic review registration number. | 2                  |
| <b>INTRODUCTION</b>                |    |                                                                                                                                                                                                                                                                                                             |                    |
| Rationale                          | 3  | Describe the rationale for the review in the context of what is already known.                                                                                                                                                                                                                              | 3                  |
| Objectives                         | 4  | Provide an explicit statement of questions being addressed with reference to participants, interventions, comparisons, outcomes, and study design (PICOS).                                                                                                                                                  | 3                  |
| <b>METHODS</b>                     |    |                                                                                                                                                                                                                                                                                                             |                    |
| Protocol and registration          | 5  | Indicate if a review protocol exists, if and where it can be accessed (e.g., Web address), and, if available, provide registration information including registration number.                                                                                                                               | 3                  |
| Eligibility criteria               | 6  | Specify study characteristics (e.g., PICOS, length of follow-up) and report characteristics (e.g., years considered, language, publication status) used as criteria for eligibility, giving rationale.                                                                                                      | 4                  |
| Information sources                | 7  | Describe all information sources (e.g., databases with dates of coverage, contact with study authors to identify additional studies) in the search and date last searched.                                                                                                                                  | 4                  |
| Search                             | 8  | Present full electronic search strategy for at least one database, including any limits used, such that it could be repeated.                                                                                                                                                                               | 4                  |
| Study selection                    | 9  | State the process for selecting studies (i.e., screening, eligibility, included in systematic review, and, if applicable, included in the meta-analysis).                                                                                                                                                   | 4                  |
| Data collection process            | 10 | Describe method of data extraction from reports (e.g., piloted forms, independently, in duplicate) and any processes for obtaining and confirming data from investigators.                                                                                                                                  | 4                  |
| Data items                         | 11 | List and define all variables for which data were sought (e.g., PICOS, funding sources) and any assumptions and simplifications made.                                                                                                                                                                       | 5                  |
| Risk of bias in individual studies | 12 | Describe methods used for assessing risk of bias of individual studies (including specification of whether this was done at the study or outcome level), and how this information is to be used in any data synthesis.                                                                                      | 5                  |
| Summary measures                   | 13 | State the principal summary measures (e.g., risk ratio, difference in means).                                                                                                                                                                                                                               | 5                  |
| Synthesis of results               | 14 | Describe the methods of handling data and combining results of studies, if done, including measures of consistency (e.g., $I^2$ ) for each meta-analysis.                                                                                                                                                   | 5                  |

|                               |    |                                                                                                                                                                                                          |    |
|-------------------------------|----|----------------------------------------------------------------------------------------------------------------------------------------------------------------------------------------------------------|----|
| Risk of bias across studies   | 15 | Specify any assessment of risk of bias that may affect the cumulative evidence (e.g., publication bias, selective reporting within studies).                                                             | 5  |
| Additional analyses           | 16 | Describe methods of additional analyses (e.g., sensitivity or subgroup analyses, meta-regression), if done, indicating which were pre-specified.                                                         | NA |
| <b>RESULTS</b>                |    |                                                                                                                                                                                                          |    |
| Study selection               | 17 | Give numbers of studies screened, assessed for eligibility, and included in the review, with reasons for exclusions at each stage, ideally with a flow diagram.                                          | 6  |
| Study characteristics         | 18 | For each study, present characteristics for which data were extracted (e.g., study size, PICOS, follow-up period) and provide the citations.                                                             | 6  |
| Risk of bias within studies   | 19 | Present data on risk of bias of each study and, if available, any outcome level assessment (see item 12).                                                                                                | 7  |
| Results of individual studies | 20 | For all outcomes considered (benefits or harms), present, for each study: (a) simple summary data for each intervention group (b) effect estimates and confidence intervals, ideally with a forest plot. | 6  |
| Synthesis of results          | 21 | Present results of each meta-analysis done, including confidence intervals and measures of consistency.                                                                                                  | 6  |
| Risk of bias across studies   | 22 | Present results of any assessment of risk of bias across studies (see Item 15).                                                                                                                          | 7  |
| Additional analysis           | 23 | Give results of additional analyses, if done (e.g., sensitivity or subgroup analyses, meta-regression [see Item 16]).                                                                                    | NA |
| <b>DISCUSSION</b>             |    |                                                                                                                                                                                                          |    |
| Summary of evidence           | 24 | Summarize the main findings including the strength of evidence for each main outcome; consider their relevance to key groups (e.g., healthcare providers, users, and policy makers).                     | 8  |
| Limitations                   | 25 | Discuss limitations at study and outcome level (e.g., risk of bias), and at review-level (e.g., incomplete retrieval of identified research, reporting bias).                                            | 9  |
| Conclusions                   | 26 | Provide a general interpretation of the results in the context of other evidence, and implications for future research.                                                                                  | 9  |
| <b>FUNDING</b>                |    |                                                                                                                                                                                                          |    |
| Funding                       | 27 | Describe sources of funding for the systematic review and other support (e.g., supply of data); role of funders for the systematic review.                                                               | 9  |

From: Moher D, Liberati A, Tetzlaff J, Altman DG, The PRISMA Group (2009). Preferred Reporting Items for Systematic Reviews and Meta-Analyses: The PRISMA Statement. PLoS Med 6(7): e1000097. doi:10.1371/journal.pmed1000097

**TABLE S2. MOOSE Checklist for Meta-analyses of Observational Studies (2)**

| Item No                                     | Recommendation                                                                                                                                                                                                                                                               | Reported on Page No                       |
|---------------------------------------------|------------------------------------------------------------------------------------------------------------------------------------------------------------------------------------------------------------------------------------------------------------------------------|-------------------------------------------|
| Reporting of background should include      |                                                                                                                                                                                                                                                                              |                                           |
| 1                                           | Problem definition                                                                                                                                                                                                                                                           | 3                                         |
| 2                                           | Hypothesis statement                                                                                                                                                                                                                                                         | 3                                         |
| 3                                           | Description of study outcome(s)                                                                                                                                                                                                                                              | 3                                         |
| 4                                           | Type of exposure or intervention used                                                                                                                                                                                                                                        | 3                                         |
| 5                                           | Type of study designs used                                                                                                                                                                                                                                                   | 3                                         |
| 6                                           | Study population                                                                                                                                                                                                                                                             | 3                                         |
| Reporting of search strategy should include |                                                                                                                                                                                                                                                                              |                                           |
| 7                                           | Qualifications of searchers (eg, librarians and investigators)                                                                                                                                                                                                               | 4                                         |
| 8                                           | Search strategy, including time period included in the synthesis and key words                                                                                                                                                                                               | 4                                         |
| 9                                           | Effort to include all available studies, including contact with authors                                                                                                                                                                                                      | 5                                         |
| 10                                          | Databases and registries searched                                                                                                                                                                                                                                            | 4                                         |
| 11                                          | Search software used, name and version, including special features used (eg, explosion)                                                                                                                                                                                      | 4                                         |
| 12                                          | Use of hand searching (eg, reference lists of obtained articles)                                                                                                                                                                                                             | 3,4                                       |
| 13                                          | List of citations located and those excluded, including justification                                                                                                                                                                                                        | 5, Table 2, eTable 3                      |
| 14                                          | Method of addressing articles published in languages other than English                                                                                                                                                                                                      | 3                                         |
| 15                                          | Method of handling abstracts and unpublished studies                                                                                                                                                                                                                         | 3                                         |
| 16                                          | Description of any contact with authors                                                                                                                                                                                                                                      | 5                                         |
| Reporting of methods should include         |                                                                                                                                                                                                                                                                              |                                           |
| 17                                          | Description of relevance or appropriateness of studies assembled for assessing the hypothesis to be tested                                                                                                                                                                   | 3                                         |
| 18                                          | Rationale for the selection and coding of data (eg, sound clinical principles or convenience)                                                                                                                                                                                | 4                                         |
| 19                                          | Documentation of how data were classified and coded (eg, multiple raters, blinding and interrater reliability)                                                                                                                                                               | 5                                         |
| 20                                          | Assessment of confounding (eg, comparability of cases and controls in studies where appropriate)                                                                                                                                                                             | 5                                         |
| 21                                          | Assessment of study quality, including blinding of quality assessors, stratification or regression on possible predictors of study results                                                                                                                                   | 4, 5                                      |
| 22                                          | Assessment of heterogeneity                                                                                                                                                                                                                                                  | 5                                         |
| 23                                          | Description of statistical methods (eg, complete description of fixed or random effects models, justification of whether the chosen models account for predictors of study results, dose-response models, or cumulative meta-analysis) in sufficient detail to be replicated | 5, Table 1                                |
| 24                                          | Provision of appropriate tables and graphics                                                                                                                                                                                                                                 | Table 1, 2, 3, Figure 1, Table 1, 2, 3, 4 |

| Item No                                 | Recommendation                                                                                                            | Reported on Page No |
|-----------------------------------------|---------------------------------------------------------------------------------------------------------------------------|---------------------|
| Reporting of results should include     |                                                                                                                           |                     |
| 25                                      | Graphic summarizing individual study estimates and overall estimate                                                       | NA                  |
| 26                                      | Table giving descriptive information for each study included                                                              | Table 2             |
| 27                                      | Results of sensitivity testing (eg, subgroup analysis)                                                                    | Table 2,3,4         |
| 28                                      | Indication of statistical uncertainty of findings                                                                         | 6, Table 2,3,4      |
| Reporting of discussion should include  |                                                                                                                           |                     |
| 29                                      | Quantitative assessment of bias (eg, publication bias)                                                                    | 6, Table 3,4        |
| 30                                      | Justification for exclusion (eg, exclusion of non-English language citations)                                             | eTable 3            |
| 31                                      | Assessment of quality of included studies                                                                                 | 7, Table 2,3,4      |
| Reporting of conclusions should include |                                                                                                                           |                     |
| 32                                      | Consideration of alternative explanations for observed results                                                            | 7                   |
| 33                                      | Generalization of the conclusions (ie, appropriate for the data presented and within the domain of the literature review) | 8                   |
| 34                                      | Guidelines for future research                                                                                            | 8                   |
| 35                                      | Disclosure of funding source                                                                                              | 8                   |

**TABLE S3. List of studies excluded after full-text assessment, with reason for exclusion**

| Author, year         | Reason for exclusion |
|----------------------|----------------------|
| Avari, 2015(3)       | NO CVD               |
| Buhagiar,, 2011(4)   | NO CVD               |
| Chwastiak, 2008(5)   | NO CVD               |
| De Hert, 2011(6)     | NO CVD               |
| Gaye, 2016(7)        | NO CVD               |
| Kreyenbuhl, 2006(8)  | NO CVD               |
| Maurer, 2008(9)      | NO CVD               |
| Rathmann, 2016(10)   | NO CVD               |
| Roberts, 2007(11)    | NO CVD               |
| Thakore, 2005(12)    | NO CVD               |
| Wang, 2005(13)       | NO CVD               |
| Weiss, 2006(14)      | NO CVD               |
| White, 2007(15)      | NO CVD               |
| Yarborough, 2018(16) | NO CVD               |
| Breese, 2012(17)     | No Data              |
| Briskman, 2012(18)   | No data              |
| Bruggeman, 2010 (19) | No Data              |
| Coblents, 2015(20)   | No Data              |
| Cohen, 2010(21)      | No Data              |
| Davidson, 2002 (22)  | No Data              |
| De Couto, 2010(23)   | No Data              |
| De Hert, 2011(24)    | No Data              |
| De Hert, 2012(25)    | No Data              |
| Greenwood, 2016(26)  | No Data              |
| Hodgson, 2010(27)    | No Data              |
| Hughes, 2011(28)     | No Data              |
| Kalra, 2019(29)      | No Data              |
| Kaur, 2019(30)       | No Data              |
| Lambert, 2009(31)    | No Data              |
| Li, 2007(32)         | No Data              |
| Nemcek, 2009(33)     | No Data              |
| Newcomer, 2007(34)   | No Data              |
| Newcomer, 2008(35)   | No Data              |
| Pope, 2011(36)       | No Data              |
| Tylee, 2010(37)      | No Data              |
| Albus, 2010(38)      | NO SMI               |
| Grace, 2008(39)      | NO SMI               |
| L'Italien, 2007(40)  | NO SMI               |
| Moulin, 2017(41)     | NO SMI               |
| Shanks, 2007(42)     | NO SMI               |
| Srivastava, 2018(43) | NO SMI               |

|                            |               |
|----------------------------|---------------|
| Vahia, 2008(44)            | NO SMI        |
| Barra, 2017(45)            | Reverse Trend |
| Coventry, 2012(46)         | Reverse Trend |
| Dickson, 2013(47)          | Reverse Trend |
| Hart, 2008(48)             | Reverse Trend |
| Kim, 2013(49)              | Reverse Trend |
| Lacey, 2004(50)            | Reverse Trend |
| Messerli, 2012(51)         | Reverse Trend |
| Schuster, 2016(52)         | Reverse Trend |
| Ski, 2017(53)              | Reverse Trend |
| Smolderen, 2017(54)        | Reverse Trend |
| Stewart, 2014(55)          | Reverse Trend |
| Sundquist, 2016(56)        | Reverse Trend |
| Towers, 2011(57)           | Reverse Trend |
| Hennekens, 2007(58)        | Review        |
| Mitchell, 2009 (59)        | Review        |
| Mitchell, 2010(60)         | Review        |
| Mitchell, 2011(61)         | Review        |
| Byrd, 2012(62)             | Risk Factor   |
| Castillo-Sanchez, 2017(63) | Risk Factor   |
| Hardy, 2013(64)            | Risk Factor   |
| Kaplowitz, 2006(65)        | Risk Factor   |
| Kilbourne, 2008 (66)       | Risk Factor   |
| Lack, 2014(67)             | Risk Factor   |
| Osborn, 2011(68)           | Risk Factor   |
| Blackburn, 2018(69)        | Risk Factor   |
| Breese, 2011(70)           | Risk Factor   |
| Ritchie, 2017(71)          | Risk factor   |

**TABLE S4. Characteristics of included studies**

| Author, year               | Design | Country | N tot   | N MI   | Age             | F%    | MI diagnosis | CVD Diagnosis | Screening Treatment                         | TYPE OF SMI                                 | MI     | CVD            | Period    |
|----------------------------|--------|---------|---------|--------|-----------------|-------|--------------|---------------|---------------------------------------------|---------------------------------------------|--------|----------------|-----------|
| Abrams, 2009(72)           | C      | US      | 21,745  | 7,812  | Mean 68.5       | 2%    | ICD-9        | ICD-9         | Revascularization                           | MDD                                         | 789    | AMI            | 2004-2006 |
|                            |        |         |         |        |                 |       |              |               |                                             | Anxiety disorders                           | 366    |                |           |
|                            |        |         |         |        |                 |       |              |               |                                             | PTSD                                        | 361    |                |           |
|                            |        |         |         |        |                 |       |              |               |                                             | BD                                          | 105    |                |           |
|                            |        |         |         |        |                 |       |              |               | Schizophrenia and other psychotic disorders | 94                                          |        |                |           |
| Attar, 2017(73)            | C      | Denmark | 141     | 47     | Mean 53.4; 54.1 | 68.7% | ICD-10       | ICD-10        | Screening                                   | Schizophrenia                               | 47     | AMI            | 1995-2015 |
|                            |        |         |         |        |                 |       |              |               | Cardiologist examination Treatment          |                                             |        |                |           |
| Attar, 2020(74)            | C      | Denmark | 2,202   | 734    | Median 58       | 35.7% | ICD-10       | ICD-10        | Coronary angiography                        | Schizophrenia                               | 734    | ACS            | 1996-2015 |
|                            |        |         |         |        |                 |       |              |               | PCI                                         |                                             |        |                |           |
|                            |        |         |         |        |                 |       |              |               | CABG                                        |                                             |        |                |           |
|                            |        |         |         |        |                 |       |              |               | Aspirin                                     |                                             |        |                |           |
|                            |        |         |         |        |                 |       |              |               | Beta-blockers                               |                                             |        |                |           |
|                            |        |         |         |        |                 |       |              |               | ACE-I/ARB                                   |                                             |        |                |           |
|                            |        |         |         |        |                 |       |              |               | Nitrate                                     |                                             |        |                |           |
| Ca+ anatagonist CABG       |        |         |         |        |                 |       |              |               |                                             |                                             |        |                |           |
| Azevedo da Silva, 2014(75) | C      | France  | 15,811  | 2,199  | Range 35-50     | 26.0% | ICD-9/10     | ICD-9/10      | Any treatment                               | MDD                                         | 1,194  | Stroke         | 2001-2011 |
|                            |        |         |         |        |                 |       |              |               |                                             | Mental disorders due to PSU                 | 252    |                |           |
|                            |        |         |         |        |                 |       |              |               |                                             | Other mental disorders                      | 166    |                |           |
|                            |        |         |         |        |                 |       |              |               |                                             | Mixed mental disorders                      | 541    |                |           |
|                            |        |         |         |        |                 |       |              |               |                                             | Severe mental disorders                     | 46     |                |           |
| Barcella, 2019 (76)        | C      | Denmark | 7,288   | 1,661  | Median 67       | 34.0% | ICD-8/10     | ICD-8/10      | Coronary angiography                        | Psychiatric disorders                       | 1,661  | Cardiac arrest | 2001-2015 |
|                            |        |         |         |        |                 |       |              |               | Revascularization                           |                                             |        |                |           |
|                            |        |         |         |        |                 |       |              |               | Implantable cardioverter defibrillator      |                                             |        |                |           |
|                            |        |         |         |        |                 |       |              |               |                                             |                                             |        |                |           |
| Blecker, 2010(77)          | C      | US      | 1,801   | 341    | Range 21-62     | 67.9% | ICD-9        | ICD-9         | Ecocardiography                             | Schizophrenia                               | 155    | HF             | 2001-2004 |
|                            |        |         |         |        |                 |       |              |               | ACE-I/ARB                                   | BD                                          | 82     |                |           |
|                            |        |         |         |        |                 |       |              |               | Beta-blockers                               | MDD                                         | 58     |                |           |
|                            |        |         |         |        |                 |       |              |               |                                             | Others                                      | 46     |                |           |
| Bongiorno, 2018(78)        | C      | US      | 325,009 | 41,510 | Median 74; 72   | 53.5% | ICD-9        | ICD-9         | IVT                                         | Schizophrenia                               | 4,368  | Stroke         | 2007-2011 |
|                            |        |         |         |        |                 |       |              |               |                                             | Anxiety                                     | 12,375 |                |           |
|                            |        |         |         |        |                 |       |              |               |                                             | MDD                                         | 25,394 |                |           |
|                            |        |         |         |        |                 |       |              |               |                                             | BD                                          | 2,841  |                |           |
| Bongiorno, 2019(79)        | C      | US      | 37,474  | 6,922  | Range 56-75     | 43.7% | ICD-9        | ICD-9         | CEA                                         | Schizophrenia and other psychotic disorders | 440    | Stroke         | 2007-2014 |
|                            |        |         |         |        |                 |       |              |               | CAS                                         |                                             |        |                |           |



| Author, year      | Design | Country   | N tot   | N MI   | Age             | F%    | MI diagnosis | CVD Diagnosis    | Screening Treatment                                                                        | TYPE OF SMI                                                                             | MI                                | CVD        | Period    |
|-------------------|--------|-----------|---------|--------|-----------------|-------|--------------|------------------|--------------------------------------------------------------------------------------------|-----------------------------------------------------------------------------------------|-----------------------------------|------------|-----------|
|                   |        |           |         |        |                 |       |              |                  |                                                                                            | SUD<br>BD<br>Anxiety disorders                                                          | 2,278<br>324<br>1,878             |            |           |
| Bresee, 2012(80)  | C      | Canada    | 323,818 | 5,673  | Mean 45.3; 47.6 | 50%   | ICD-9/10     | ICD-9/10         | Cardiologist visit<br>Revascularization                                                    | Schizophrenia                                                                           | 5,673                             | CHD        | 1995-2006 |
| Campi, 2017(81)   | C      | US        | 61,614  | 1,036  | Mean 60.2; 65.2 | 31,3% | ICD-9        | ICD-9            | Reperfusion Therapy                                                                        | BD<br>MDD<br>Schizophrenia                                                              | 567<br>314<br>207                 | AMI        | 2010-2015 |
| Chang, 2020(82)   | C      | Hong Kong | 67,692  | 703    | 18+             | NA    | ICD-9        | ICD-9            | PCI<br>CABG                                                                                | Schizophrenia and other psychotic disorders                                             | 703                               | ACS        | 1996-2001 |
| Desai, 2002(83)   | C      | US        | 5,886   | 1,613  | Mean 65.2       | 1.4%  | ICD-9        | ICD-9            | Aspirin use<br>Beta-blockers                                                               | Major affective disorder<br>Other mental disorders<br>Psychotic disorder<br>PTSD<br>SUD | 366<br>1,224<br>188<br>252<br>308 | AMI        | 1998-1999 |
| Druss, 2000(84)   | C      | US        | 113,653 | 5,365  | Mean 75.5       | 53,4% | ICD-9        | ICD-9            | PCI<br>CABG<br>Coronary angiography                                                        | Schizophrenia<br>Affective Disorder<br>Other mental disorders<br>SUD                    | 188<br>315<br>3,724<br>1,138      | AMI        | 1994-1995 |
| Druss, 2001(85)   | C      | US        | 88,241  | 4,664  | Mean 76.1       | 52.7% | ICD-9        | ICD-9            | Revascularization<br>Aspirin<br>Beta-blockers<br>ACE-I                                     | Schizophrenia<br>Affective Disorders<br>SUD                                             | 161<br>271<br>882                 | AMI        | 1994-1995 |
| Gal, 2016(86)     | CC     | Israel    | 8,208   | 2,277  | Mean 68.1       | 60.8% | ICD-10       | ICD-10           | Stress test<br>Chest X-ray<br>Cardiologist visit<br>PCI<br>CABG<br>Pace-maker<br>Treatment | Schizophrenia                                                                           | 2,277                             | CVD        | 2000-2009 |
| Gal, 2017(87)     | CC     | Israel    | 57,774  | 19,258 | Mean 63; 66.6   | 48.1% | ICD-10       | ICD-10           | Stress test<br>Chest X-ray<br>Cardiologist visit                                           | Schizophrenia<br>BD                                                                     | 17,041<br>2,217                   | CVD        | 2000-2009 |
| Hauck, 2020(88)   | C      | Ontario   | 108,610 | 1,145  | Mean 68.0       | 36.4% | ICD-9        | ICD-9,<br>DSM-IV | Coronary angiography<br>PCI<br>CABG                                                        | Schizophrenia                                                                           | 1,145                             | AMI        | 2008-2015 |
| Heiberg, 2019(89) | C      | Norway    | 72,451  | 1,487  | NA              | 52.9% | ICD-10       | ICD-10           | CVD diagnosed prior to cardiovascular death                                                | Schizophrenia<br>BD                                                                     | 814<br>673                        | AMI<br>CHD | 2011-2016 |

| Author, year            | Design | Country | N tot   | N MI  | Age             | F%    | MI diagnosis | CVD Diagnosis | Screening Treatment                                                                                              | TYPE OF SMI                                                                                                               | MI                               | CVD                                                       | Period    |
|-------------------------|--------|---------|---------|-------|-----------------|-------|--------------|---------------|------------------------------------------------------------------------------------------------------------------|---------------------------------------------------------------------------------------------------------------------------|----------------------------------|-----------------------------------------------------------|-----------|
| Heiberg, 2020(90)       | C      | Norway  | 72,385  | 1,487 | Mean 84; 76     |       | ICD-10       | ICD-10        | Echocardiography                                                                                                 | Schizophrenia                                                                                                             | 814                              | HF<br>Arrhythmia<br>CBVD<br>Others                        | 2008-2016 |
|                         |        |         |         |       |                 |       |              |               | Coronary angiography<br>US peripheral vessels<br>PCI<br>CABG<br>ECG                                              | BD                                                                                                                        | 673                              | AR<br>HF<br>AMI<br>CBVD<br>Valvular disease<br>PVD<br>PCD |           |
| Hippisley-Cox, 2007(91) | CS     | UK      | 127,932 | 701   | Range 55-75     | 40.9% | ICD-9/10     | ICD-9/10      | Statin                                                                                                           | Schizophrenia                                                                                                             | 332                              | CHD                                                       | 2003-2005 |
|                         |        |         |         |       |                 |       |              |               | Exercise testing or referral for newly diagnosed angina<br>Aspirin, antiplatelet, anticoagulant<br>Beta-blockers | BD                                                                                                                        | 369                              |                                                           |           |
| Jacobsen, 2017(92)      | C      | Denmark | 12,102  | 457   | Mean 61.9; 64.1 | 25.9% | ICD-10       | ICD-10        | Aspirin/clopidogrel                                                                                              | BD                                                                                                                        | 242                              | CHD                                                       | 2002-2012 |
|                         |        |         |         |       |                 |       |              |               | Beta-blockers<br>Statins<br>ACE-I                                                                                | Schizophrenia<br>Schizoaffective<br>Others                                                                                | 43<br>21<br>151                  |                                                           |           |
| Jones, 2005(93)         | C      | US      | 3,368   | 1,342 | Range 18-64     | 23.8% | ICD-9        | ICD-9         | PCI                                                                                                              | Anxiety disorders                                                                                                         | NA                               | AMI                                                       | 1996-2001 |
|                         |        |         |         |       |                 |       |              |               | CABG                                                                                                             | Mood disorders<br>Cognitive disorders<br>Schizophrenia and other psychotic disorders<br>Sexual disorders<br>SUD<br>Others | NA<br>NA<br>NA<br>NA<br>NA<br>NA |                                                           |           |
| Kisely, 2007(94)        | C      | Canada  | 17,655  | 2,839 | NA              | NA    | ICD-9        | ICD-9         | Coronary angiography                                                                                             | Schizophrenia and other psychotic disorders                                                                               | NA                               | CHD                                                       | 1995-2001 |
|                         |        |         |         |       |                 |       |              |               | PCI<br>CABG<br>Cerebrovascular arteriography<br>CEA                                                              | Dementia<br>Mood disorders<br>SUD                                                                                         | NA<br>NA<br>NA                   | Stroke<br>Other<br>CVD                                    |           |

| Author, year         | Design | Country   | N tot     | N MI  | Age             | F%    | MI diagnosis     | CVD Diagnosis | Screening Treatment                                                                                                                                                                                                         | TYPE OF SMI                                                                     | MI                   | CVD           | Period    |
|----------------------|--------|-----------|-----------|-------|-----------------|-------|------------------|---------------|-----------------------------------------------------------------------------------------------------------------------------------------------------------------------------------------------------------------------------|---------------------------------------------------------------------------------|----------------------|---------------|-----------|
| Kisely, 2009(95)     | C      | Canada    | 65,039    | 1,879 | Mean 65.4; 70.4 | 44.5% | ICD-9/10, DSM-IV | ICD-9/10      | Coronary angiography<br>PCI<br>CABG<br>Beta-Blockers<br>ACE-I/ARB<br>Clopidogrel<br>Statins<br>Cerebrovascular arteriography<br>Carotid endarterectomy<br>Ticlopidine (stroke)<br>Warfarin (stroke)<br>Clopidogrel (stroke) | Schizophrenia and other psychotic disorders                                     | 1,879                | CHD<br>Stroke | 1995-2001 |
| Kugathasan, 2018(96) | C      | Denmark   | 105,018   | 684   | Mean 57.3; 61.0 | 29.6% | ICD-8/10         | ICD-8/10      | PCI<br>Aspirin/clopidogrel<br>Vitamin K antagonist<br>Beta-blockers<br>ACE-I<br>Statins                                                                                                                                     | Schizophrenia                                                                   | 684                  | AMI           | 1995-2015 |
| Kurdyak, 2012(97)    | C      | Canada    | 71,668    | 842   | Mean 66.1; 67.7 | 37.0% | ICD-9/10, DSM-IV | ICD-9         | Evidence-based treatments<br>Cardiologist visit post discharge                                                                                                                                                              | Schizophrenia                                                                   | 842                  | AMI           | 2002-2006 |
| Lahti, 2012(98)      | C      | Finland   | 10,915    | 204   | Range 0-60      | 47.7% | ICD-8/9/10       | ICD-8/9/10    | Treatment with medications                                                                                                                                                                                                  | Schizophrenia                                                                   | 204                  | CHD           | 1944-2004 |
| Laursen, 2009(99)    | C      | Denmark   | 571,068   | 4,997 | Range 40-80     | NA    | ICD-8/10         | ICD-8/10      | PCI<br>CABG                                                                                                                                                                                                                 | BD<br>Schizophrenia<br>Schizoaffective Disorder                                 | NA<br>NA<br>NA       | CHD           | 1994-2007 |
| Laursen, 2014(100)   | C      | Denmark   | 1,061,532 | NA    | 36.1            | NA    | ICD-8/10         | ICD-8/10      | Aspiring/Clopidogrel<br>Statins<br>ACE-I/ARB<br>Ca++ antagonist<br>Beta-blocker<br>Diuretics<br>Other antihypertensives<br>Others                                                                                           | BD<br>Schizophrenia<br>Others                                                   | NA<br>NA<br>NA       | CHD<br>CBVD   | 1998-2008 |
| Lawrence, 2003(101)  | C      | Australia | 23,900    | 1,807 | NA              | NA    | ICD-9            | ICD-9         | CABG<br>Removal of coronary artery obstructions                                                                                                                                                                             | MDD<br>BD<br>Schizophrenia and other psychotic disorders<br>Affective disorders | NA<br>NA<br>NA<br>NA | AMI<br>CHD    | 1980-1988 |

| Author, year              | Design | Country | N tot     | N MI    | Age             | F%    | MI diagnosis | CVD Diagnosis | Screening Treatment                                                                                       | TYPE OF SMI                                 | MI      | CVD    | Period    |
|---------------------------|--------|---------|-----------|---------|-----------------|-------|--------------|---------------|-----------------------------------------------------------------------------------------------------------|---------------------------------------------|---------|--------|-----------|
|                           |        |         |           |         |                 |       |              |               |                                                                                                           | Substance induced psychoses                 | NA      |        |           |
|                           |        |         |           |         |                 |       |              |               |                                                                                                           | Other psychiatric disorder                  | NA      |        |           |
| Li, 2013(102)             | C      | US      | 102,783   | 28,888  | Mean 79.9       | 49.5% | ICD-9        | ICD-9         | Invasive procedure                                                                                        | Psychiatric disorders (non SUD)             | 26,497  | AMI    | 2007      |
|                           |        |         |           |         |                 |       |              |               |                                                                                                           | SUD                                         | 1,223   |        |           |
|                           |        |         |           |         |                 |       |              |               |                                                                                                           | Dual diagnosis                              | 1,168   |        |           |
| Manderback a, 2012(103)   | C      | Finland | 533,451   | 164,999 | 40+             | NA    | ICD-10       | ICD-10        | PCI<br>CABG                                                                                               | Schizophrenia spectrum disorders            | 67,659  | CHD    | 1998-2009 |
|                           |        |         |           |         |                 |       |              |               |                                                                                                           | Mood disorders                              | 50,135  |        |           |
|                           |        |         |           |         |                 |       |              |               |                                                                                                           | SUD                                         | 47,205  |        |           |
| Mansuri, 2016 (S103)(104) | C      | US      | 4,320,304 | 371,546 | NA              | NA    | ICD-9        | ICD-9         | IVT                                                                                                       | MDD                                         | 371,546 | Stroke | 2002-2012 |
| Mansuri, 2016 (S323)(105) | C      | US      | 4,320,304 | 116,648 | NA              | NA    | ICD-9        | ICD-9         | IVT                                                                                                       | Schizophrenia                               | 116,648 | Stroke | 2002-2012 |
| McGinty, 2012(106)        | C      | US      | 633       | 137     | Mean 54.1; 51.7 | 61.5% | ICD-9        | ICD-9         | Evidence-based treatments<br>Beta-blockers<br>Statins<br>ACE-I/ARB<br>Coronary angiography<br>PCI<br>CABG | Psychiatric disorders                       | 137     | AMI    | 1994-2004 |
| Mohamed, 2019(107)        | C      | U.S.    | 6,738,757 | 439,544 | NA              | NA    | ICD-9        | ICD-9         | PCI<br>Coronary angiography                                                                               | Schizophrenia                               | 23,582  | AMI    | 2004-2014 |
|                           |        |         |           |         |                 |       |              |               |                                                                                                           | Other non organic psychosis                 | 22,359  |        |           |
|                           |        |         |           |         |                 |       |              |               |                                                                                                           | BD                                          | 41,362  |        |           |
|                           |        |         |           |         |                 |       |              |               |                                                                                                           | MDD                                         | 352,241 |        |           |
| Murugiah, 2012(108)       | C      | US      | 1,196,698 | 4,648   | Mean 67.6       | 40.2% | ICD-9        | ICD-9         | PCI<br>CABG                                                                                               | Schizophrenia                               | 4,648   | AMI    | 2000-2008 |
| Petersen, 2003(109)       | C      | US      | 4,340     | 859     | Mean 63; 66.7   | 0%    | ICD-9        | ICD-9         | Coronary angiography<br>PCI<br>CABG<br>IVT<br>Beta-blockers<br>ACE-I<br>Aspirin                           | BD                                          | NA      | AMI    | 1994-1995 |
|                           |        |         |           |         |                 |       |              |               |                                                                                                           | MDD                                         | NA      |        |           |
|                           |        |         |           |         |                 |       |              |               |                                                                                                           | PTSD                                        | NA      |        |           |
|                           |        |         |           |         |                 |       |              |               |                                                                                                           | Schizophrenia and other psychotic disorders | NA      |        |           |
|                           |        |         |           |         |                 |       |              |               |                                                                                                           | SUD                                         | NA      |        |           |
| Plomondon, 2007(110)      | C      | US      | 14,194    | 2,623   | Mean 64; 69.6   | 2.7%  | ICD-9        | ICD-9         | Coronary angiography<br>PCI<br>CABG<br>ACE-I/ARB<br>Aspirin                                               | Anxiety disorders                           | 1,718   | ACS    | 2003-2005 |
|                           |        |         |           |         |                 |       |              |               |                                                                                                           | Mood disorders                              | 1,235   |        |           |
|                           |        |         |           |         |                 |       |              |               |                                                                                                           | Personality disorders                       | 307     |        |           |
|                           |        |         |           |         |                 |       |              |               |                                                                                                           | Schizophrenia                               | 406     |        |           |

| Author, year               | Design | Country     | N tot     | N MI   | Age             | F%    | MI diagnosis | CVD Diagnosis | Screening Treatment                                                                    | TYPE OF SMI                                                                      | MI                        | CVD                               | Period    |
|----------------------------|--------|-------------|-----------|--------|-----------------|-------|--------------|---------------|----------------------------------------------------------------------------------------|----------------------------------------------------------------------------------|---------------------------|-----------------------------------|-----------|
| Rathore, 2008(111)         | C      | US          | 53,314    | 9,063  | Mean 78.1; 79.8 | 61.1% | ICD-9        | ICD-9         | Beta-blockers<br>Echocardiography                                                      | Psychiatric disorders                                                            | 9,063                     | HF                                | 1998-2001 |
| Schulman-Marcus, 2016(112) | C      | US          | 3,058,697 | 29,503 | Mean 65.1       | 38.3% | ICD-9        | ICD-9         | ACE-I/ARB<br>Revascularization<br>PCI<br>CABG                                          | Schizophrenia<br>BD<br>Dual diagnosis                                            | 12,590<br>15,679<br>1,234 | AMI                               | 2003-2012 |
| Smith, 2013(113)           | C      | UK          | 81,155    | 170    | Mean 48.0       | 60.1% | ICD-9        | ICD-9         | Statin<br>Any antihypertensive<br>Aspirin or clopidogrel                               | BD                                                                               | 170                       | CHD<br>HF<br>Stroke<br>TIA<br>PVD | 2007      |
| Swardfager, 2011(114)      | C      | US          | 195       | 43     | Mean 64.5       | 20.5% | DSM-IV       | NA            | Cardiac rehabilitation                                                                 | MDD                                                                              | 43                        | CHD                               | 2006-2006 |
| Swildens, 2016(115)        | C      | Netherlands | 66,620    | 4,770  | Mean 47.5       | 39.9% | DSM-IV       | ICD-10        | Treatment                                                                              | Schizophrenia and other psychotic disorders                                      | 4,770                     | CVD                               | 2007-2009 |
| Woodhead, 2016(116)        | CS     | UK          | 274,725   | 4,056  | Range 16-75     | 50.7% | ICD-9/10     | ICD-9/10      | Beta-blockers<br>ACEI/ARB<br>Antiplatelet/anticoagulant<br>Statin<br>Quadruple therapy | Schizophrenia and other psychotic disorders<br>BD<br>Other non organic psychosis | 1,721<br>716<br>773       | CHD<br>HF<br>Stroke<br>TIA        | 2012-2013 |
| Wu, 2013(117)              | C      | Taiwan      | 3,361     | 834    | Mean 64.2       | 37.8% | ICD-9        | ICD-9         | Coronary angiography<br>PCI<br>CABG                                                    | BD<br>Schizophrenia                                                              | 243<br>591                | AMI                               | 1996-2007 |
| Young, 2000(118)           | C      | US          | 354,195   | 25,237 | NA              | NA    | ICD-9        | ICD-9         | Coronary angiography<br>PCI<br>CABG                                                    | Psychiatric disorders                                                            | 25,237                    | AMI                               | 1998      |

**Legend.** ACE-I, angiotensin converting enzyme inhibitors; ACS, acute coronary syndrome; AMI, acute myocardial infarction; AR, arrhythmia; ARB, angiotensin receptor blockers; BD, bipolar disorder; C, cohort; CAS, carotid artery stenting; CBVD, cerebrovascular disease; CC, case-control; CEA, carotid endarterectomy; CS, cross-sectional; ECG, electrocardiography; HF, heart failure; PCD, pulmonary circulation disease; PCI, percutaneous coronary intervention; PVD, peripheral vascular disease; TIA, transient ischemic attack; US, ultrasound.

**TABLE S5. Quality of included case-control and cohort studies, according to Newcastle-Ottawa scale (119)**

| Author, year                | Selection                 |                                     |                                  |                                             | Comparability        | Exposure (case-control) / Outcome (cohort) |                                        |                                  |            |
|-----------------------------|---------------------------|-------------------------------------|----------------------------------|---------------------------------------------|----------------------|--------------------------------------------|----------------------------------------|----------------------------------|------------|
| <b>Case-control studies</b> |                           |                                     |                                  |                                             |                      |                                            |                                        |                                  |            |
|                             | <i>Case definition</i>    | <i>Representativeness</i>           | <i>Control Selection</i>         | <i>Control Definition</i>                   | <i>Comparability</i> | <i>Ascertainment</i>                       | <i>Same ascertainment case control</i> | <i>No response rate</i>          | <i>TOT</i> |
| Hippisley-Cox, 2007(91)     | 1                         | 1                                   | 1                                | 0                                           | 2                    | 1                                          | 1                                      | 1                                | 8          |
| Schulman-Marcus, 2016(112)  | 0                         | 1                                   | 1                                | 1                                           | 2                    | 1                                          | 1                                      | 1                                | 8          |
| Woodhead, 2016(116)         | 0                         | 1                                   | 1                                | 1                                           | 2                    | 1                                          | 0                                      | 1                                | 7          |
| <b>Cohort studies</b>       |                           |                                     |                                  |                                             |                      |                                            |                                        |                                  |            |
|                             | <i>Representativeness</i> | <i>Selection non exposed cohort</i> | <i>Ascertainment of exposure</i> | <i>Demonstration on no outcome baseline</i> | <i>Comparability</i> | <i>Assessment of outcome</i>               | <i>Follow-up long enough</i>           | <i>Adequacy follow-up cohort</i> | <i>TOT</i> |
| Abrams, 2009(72)            | 1                         | 1                                   | 1                                | 1                                           | 2                    | 1                                          | 1                                      | 1                                | 9          |
| Attar, 2017(73)             | 1                         | 1                                   | 1                                | 1                                           | 1                    | 1                                          | 1                                      | 1                                | 8          |
| Attar, 2020(74)             | 1                         | 1                                   | 1                                | 0                                           | 2                    | 1                                          | 1                                      | 1                                | 8          |
| Azevedo da Silva, 2014(75)  | 1                         | 1                                   | 1                                | 1                                           | 1                    | 1                                          | 1                                      | 1                                | 8          |
| Barcella, 2019(76)          | 1                         | 1                                   | 0                                | 1                                           | 2                    | 1                                          | 1                                      | 1                                | 8          |
| Blecker, 2010(77)           | 0                         | 1                                   | 0                                | 1                                           | 2                    | 1                                          | 1                                      | 1                                | 7          |
| Bongiorno, 2018(78)         | 1                         | 1                                   | 1                                | 1                                           | 2                    | 1                                          | 1                                      | 1                                | 9          |
| Bongiorno, 2019(79)         | 1                         | 1                                   | 1                                | 1                                           | 2                    | 1                                          | 0                                      | 0                                | 7          |
| Bresee, 2012(80)            | 1                         | 1                                   | 0                                | 0                                           | 1                    | 1                                          | 1                                      | 1                                | 6          |
| Campi, 2017(81)             | 1                         | 1                                   | 1                                | 1                                           | 2                    | 1                                          | 1                                      | 1                                | 9          |
| Chang, 2020(82)             | 1                         | 1                                   | 0                                | 1                                           | 1                    | 1                                          | 1                                      | 1                                | 7          |
| Desai, 2002(83)             | 0                         | 1                                   | 1                                | 1                                           | 1                    | 1                                          | 0                                      | 1                                | 6          |
| Druss, 2000(84)             | 0                         | 1                                   | 1                                | 1                                           | 2                    | 1                                          | 1                                      | 1                                | 7          |
| Druss, 2001(85)             | 0                         | 1                                   | 1                                | 1                                           | 2                    | 1                                          | 0                                      | 0                                | 6          |
| Gal, 2016(86)               | 1                         | 1                                   | 1                                | 0                                           | 2                    | 1                                          | 1                                      | 1                                | 8          |
| Gal, 2017(87)               | 1                         | 1                                   | 1                                | 0                                           | 1                    | 1                                          | 1                                      | 1                                | 7          |
| Hauck, 2020(88)             | 1                         | 1                                   | 1                                | 1                                           | 2                    | 1                                          | 1                                      | 1                                | 9          |
| Heiberg, 2019(89)           | 1                         | 1                                   | 1                                | 1                                           | 2                    | 1                                          | 1                                      | 1                                | 9          |
| Heiberg, 2020(90)           | 1                         | 1                                   | 1                                | 1                                           | 2                    | 1                                          | 0                                      | 1                                | 8          |
| Jacobsen, 2017(92)          | 1                         | 1                                   | 1                                | 1                                           | 2                    | 1                                          | 1                                      | 1                                | 9          |
| Jones, 2005(93)             | 1                         | 1                                   | 1                                | 1                                           | 1                    | 1                                          | 1                                      | 1                                | 8          |
| Kisely, 2007(94)            | 1                         | 1                                   | 1                                | 1                                           | 1                    | 1                                          | 1                                      | 1                                | 8          |
| Kisely, 2009(95)            | 1                         | 1                                   | 1                                | 1                                           | 2                    | 1                                          | 1                                      | 1                                | 9          |
| Kugathasan, 2018(96)        | 1                         | 1                                   | 1                                | 1                                           | 2                    | 1                                          | 1                                      | 1                                | 9          |
| Kurdyak, 2012(97)           | 1                         | 1                                   | 1                                | 0                                           | 2                    | 1                                          | 1                                      | 1                                | 8          |
| Lahti, 2012(98)             | 1                         | 1                                   | 1                                | 0                                           | 2                    | 1                                          | 1                                      | 0                                | 7          |
| Laursen, 2009(99)           | 1                         | 1                                   | 1                                | 1                                           | 1                    | 1                                          | 1                                      | 1                                | 8          |
| Laursen, 2014(100)          | 1                         | 1                                   | 1                                | 0                                           | 2                    | 1                                          | 1                                      | 1                                | 8          |

|                           |   |   |   |   |   |   |   |   |   |
|---------------------------|---|---|---|---|---|---|---|---|---|
| Lawrence,<br>2003(101)    | 1 | 1 | 1 | 1 | 1 | 1 | 1 | 1 | 8 |
| Li, 2013(102)             | 1 | 1 | 1 | 0 | 2 | 1 | 0 | 1 | 7 |
| Manderbacka,<br>2012(103) | 1 | 1 | 1 | 0 | 1 | 1 | 1 | 1 | 7 |
| Mansuri,<br>2016(104)     | 1 | 1 | 0 | 1 | 1 | 1 | 1 | 1 | 7 |
| Mansuri,<br>2016(105)     | 1 | 1 | 1 | 1 | 1 | 1 | 1 | 1 | 8 |
| McGinty,<br>2012(106)     | 0 | 1 | 0 | 1 | 2 | 1 | 1 | 1 | 7 |
| Mohamed,<br>2019(107)     | 1 | 1 | 1 | 1 | 1 | 1 | 1 | 1 | 8 |
| Murugiah,<br>2012(108)    | 1 | 1 | 1 | 0 | 1 | 1 | 1 | 1 | 7 |
| Petersen,<br>2003(109)    | 0 | 1 | 1 | 1 | 2 | 1 | 1 | 1 | 8 |
| Plomondon,<br>2007(110)   | 1 | 0 | 1 | 1 | 1 | 1 | 1 | 1 | 7 |
| Rathore,<br>2008(111)     | 1 | 1 | 1 | 1 | 2 | 1 | 1 | 1 | 9 |
| Smith,<br>2013(113)       | 1 | 1 | 0 | 0 | 2 | 1 | 0 | 0 | 5 |
| Swardfager,<br>2011(114)  | 0 | 1 | 1 | 0 | 1 | 1 | 1 | 0 | 5 |
| Swildens,<br>2016(115)    | 1 | 1 | 1 | 0 | 2 | 1 | 1 | 1 | 9 |
| Wu, 2013(117)             | 1 | 1 | 1 | 1 | 2 | 1 | 1 | 1 | 9 |
| Young,<br>2000(118)       | 1 | 1 | 0 | 1 | 1 | 1 | 0 | 0 | 5 |

**TABLE S6. Country subgroup analyses on screening/monitoring and treatment of any and specific cardiovascular diseases**

| Country                                                           | Cardiovascular disease | Mental disorder | Publication/samples | OR    | 95%CI       | I2     | Subgroup comparison |         |
|-------------------------------------------------------------------|------------------------|-----------------|---------------------|-------|-------------|--------|---------------------|---------|
| <b>Any cardiovascular disease</b>                                 |                        |                 |                     |       |             |        |                     |         |
| Australia                                                         | Any                    | Any             | 1/6                 | 0.838 | 0.774 0.908 | NA     | p<0.001             |         |
| Canada                                                            | Any                    | Any             | 5/5                 | 0.607 | 0.543 0.677 | 35.160 |                     |         |
| Denmark                                                           | Any                    | Any             | 7/9                 | 0.651 | 0.511 0.830 | 87.162 |                     |         |
| Finland                                                           | Any                    | Any             | 2/4                 | 0.893 | 0.868 0.919 | 0      |                     |         |
| France                                                            | Any                    | Any             | 1/1                 | 1.163 | 0.979 1.381 | NA     |                     |         |
| Hong-Kong                                                         | Any                    | Any             | 1/1                 | 0.593 | 0.495 0.723 | NA     |                     |         |
| Israel                                                            | Any                    | Any             | 2/3                 | 0.757 | 0.598 0.959 | 0.023  |                     |         |
| Netherlands                                                       | Any                    | Any             | 1/1                 | 0.931 | 0.835 1.037 | NA     |                     |         |
| Norway                                                            | Any                    | Any             | 2/4                 | 0.701 | 0.593 0.829 | 0      |                     |         |
| Taiwan                                                            | Any                    | Any             | 1/2                 | 0.384 | 0.289 0.510 | NA     |                     |         |
| United Kingdom                                                    | Any                    | Any             | 3/4                 | 0.758 | 0.513 1.122 | 80.295 |                     |         |
| United States of America                                          | Any                    | Any             | 21/50               | 0.809 | 0.768 0.852 | 95.557 |                     |         |
| <b>Acute myocardial infarction, ischemic heart disease</b>        |                        |                 |                     |       |             |        |                     |         |
| Australia                                                         | CAD                    | Any             | 1/6                 | 0.838 | 0.774 0.908 | NA     | p<0.001             |         |
| Canada                                                            | CAD                    | Any             | 5/5                 | 0.658 | 0.518 0.835 | 91.007 |                     |         |
| Denmark                                                           | CAD                    | Any             | 5/5                 | 0.604 | 0.466 0.782 | 72.018 |                     |         |
| Finland                                                           | CAD                    | Any             | 2/4                 | 0.893 | 0.868 0.919 | 0      |                     |         |
| Hong-Kong                                                         | CAD                    | Any             | 1/1                 | 0.593 | 0.485 0.723 | NA     |                     |         |
| Norway                                                            | CAD                    | Any             | 1/2                 | 0.688 | 0.491 0.965 | NA     |                     |         |
| Taiwan                                                            | CAD                    | Any             | 1/2                 | 0.384 | 0.289 0.510 | NA     |                     |         |
| United Kingdom                                                    | CAD                    | Any             | 3/4                 | 0.782 | 0.543 1.126 | 77.928 |                     |         |
| United States of America                                          | CAD                    | Any             | 15/34               | 0.790 | 0.726 0.860 | 96.517 |                     |         |
| <b>Cerebrovascular disease, stroke, transient ischemic attack</b> |                        |                 |                     |       |             |        |                     |         |
| Canada                                                            | CBVD                   | Any             | 2/2                 | 0.658 | 0.435 0.995 | 0      |                     | p=0.505 |
| Norway                                                            | CBVD                   | Any             | 1/2                 | 0.718 | 0.481 1.071 | NA     |                     |         |
| United Kingdom                                                    | CBVD                   | Any             | 1/1                 | 1.040 | 0.640 1.690 | NA     |                     |         |
| United States of America                                          | CBVD                   | Any             | 4/14                | 0.811 | 0.778 0.845 | 86.101 |                     |         |
| <b>Mixed cardiovascular disease</b>                               |                        |                 |                     |       |             |        |                     |         |
| Denmark                                                           | Mixed                  | Any             | 2/4                 | 0.762 | 0.536 1.083 | 86.971 | p<0.001             |         |
| France                                                            | Mixed                  | Any             | 1/1                 | 1.163 | 0.979 1.381 | NA     |                     |         |
| Israel                                                            | Mixed                  | Any             | 2/2                 | 0.757 | 0.598 0.959 | 76.358 |                     |         |
| Netherlands                                                       | Mixed                  | Any             | 1/1                 | 0.931 | 0.835 1.037 | NA     |                     |         |
| Norway                                                            | Mixed                  | Any             | 2/4                 | 0.698 | 0.588 0.828 | 0      |                     |         |
| United Kingdom                                                    | Mixed                  | Any             | 1/1                 | 0.289 | 0.150 0.559 | NA     |                     |         |
| United States of America                                          | Mixed                  | Any             | 2/2                 | 0.986 | 0.851 1.142 | 56.407 |                     |         |

Legend. CAD, coronary artery disease; CBVD, cerebrovascular disease; CI, confidence interval; OR, odds ratio.



**TABLE S7. Confounding by indication subgroup analyses on screening/monitoring and treatment of any and specific cardiovascular diseases**

| Confounding by indication                                         | Cardiovascular disease | Mental disorder | Publication/samples | OR    | 95%CI       | I2     | Subgroup comparison |
|-------------------------------------------------------------------|------------------------|-----------------|---------------------|-------|-------------|--------|---------------------|
| <b>Any cardiovascular disease</b>                                 |                        |                 |                     |       |             |        |                     |
| No confounding by indication                                      | Any                    | Any             | 42/84               | 0.758 | 0.726 0.792 | 94.020 | p=0.009             |
| Confounding by indication                                         | Any                    | Any             | 5/6                 | 0.926 | 0.802 1.069 | 76.889 |                     |
| <b>Acute myocardial infarction, ischemic heart disease</b>        |                        |                 |                     |       |             |        |                     |
| No confounding by indication                                      | CAD                    | Any             | 32/61               | 0.725 | 0.681 0.772 | 95.047 | p=0.002             |
| Confounding by indication                                         | CAD                    | Any             | 2/2                 | 1.022 | 0.833 1.253 | 5.863  |                     |
| <b>Cerebrovascular disease, stroke, transient ischemic attack</b> |                        |                 |                     |       |             |        |                     |
| No confounding by indication                                      | CBVD                   | Any             | 7/18                | 0.810 | 0.779 0.843 | 74.371 | p=0.486             |
| Confounding by indication                                         | CBVD                   | Any             | 1/1                 | 0.656 | 0.363 1.187 | NA     |                     |
| <b>Mixed cardiovascular disease</b>                               |                        |                 |                     |       |             |        |                     |
| No confounding by indication                                      | Mixed                  | Any             | 8/12                | 0.760 | 0.648 0.890 | 83.247 | p=0.058             |
| Confounding by indication                                         | Mixed                  | Any             | 3/4                 | 0.948 | 0.804 1.118 | 88.245 |                     |

Legend. CAD, coronary artery disease; CBVD, cerebrovascular disease; CI, confidence interval; OR, odds ratio.

## Supplementary References

1. Moher D, Liberati A, Tetzlaff J, Altman DG. Preferred reporting items for systematic reviews and meta-analyses: the PRISMA statement. *J Clin Epidemiol*. 2009 Oct 1;62(10):1006–12.
2. Stroup DF, Berlin JA, Morton SC, Olkin I, Williamson GD, Rennie D, et al. Meta-analysis of observational studies in epidemiology: A proposal for reporting. *J Am Med Assoc*. 2000 Apr 19;283(15):2008–12.
3. Avari JN, Alexopoulos GS. Models of care for late-life depression of the medically ill: Examples from chronic obstructive pulmonary disease and stroke. *Am J Geriatr Psychiatry*. 2015;
4. Buhagiar K, Parsonage L, Osborn DPJ. Physical health behaviours and health locus of control in people with schizophrenia-spectrum disorder and bipolar disorder: A cross-sectional comparative study with people with non-psychotic mental illness. *BMC Psychiatry*. 2011;
5. Chwastiak LA, Rosenheck RA, Kazis LE. Utilization of primary care by veterans with psychiatric illness in the national department of veterans affairs health care system. *J Gen Intern Med [Internet]*. 2008 Nov 16 [cited 2020 Oct 28];23(11):1835–40. Available from: <https://link.springer.com/article/10.1007/s11606-008-0786-7>
6. De Hert M. S39-01 - Physical health problems in serious mental illness — Possible solutions. *Eur Psychiatry*. 2011;26:2149.
7. Gaye B, Prugger C, Perier MC, Thomas F, Plichart M, Guibout C, et al. High level of depressive symptoms as a barrier to reach an ideal cardiovascular health. *The Paris Prospective Study III*. *Sci Rep*. 2016;
8. Kreyenbuhl J, Dickerson FB, Medoff DR, Brown CH, Goldberg RW, Fang LJ, et al. Extent and Management of cardiovascular risk factors in patients with type 2 diabetes and serious mental illness. *J Nerv Ment Dis [Internet]*. 2006 Jun [cited 2020 Oct 26];194(6):404–10. Available from: <https://pubmed.ncbi.nlm.nih.gov/16772856/>
9. Maurer J, Rebbapragada V, Borson S, Goldstein R, Kunik ME, Yohannes AM, et al. Anxiety and depression in COPD: Current understanding, unanswered questions, and research needs. In: *Chest*. 2008.
10. Rathmann W, Pscherer S, Konrad M, Kostev K. Diabetes treatment in people with type 2 diabetes and schizophrenia: Retrospective primary care database analyses. *Prim Care Diabetes*. 2016 Feb 1;10(1):36–40.
11. Roberts L, Roalfe A, Wilson S, Lester H. Physical health care of patients with schizophrenia in primary care: A comparative study. *Fam Pract [Internet]*. 2007 Feb 1 [cited 2020 Nov 5];24(1):34–40. Available from: <https://academic.oup.com/fampra/article/24/1/34/485925>
12. Thakore JH. Metabolic syndrome and schizophrenia. *British Journal of Psychiatry*. 2005.
13. Wang PS, Avorn J, Brookhart MA, Mogun H, Schneeweiss S, Fischer MA, et al. Effects of noncardiovascular comorbidities on antihypertensive use in elderly hypertensives. *Hypertension*. 2005;46(2):273–9.
14. Weiss AP, Henderson DC, Weilburg JB, Goff DC, Meigs JB, Cagliero E, et al. Treatment of Cardiac Risk Factors Among Patients With Schizophrenia and Diabetes. *Psychiatr Serv*. 2006;
15. Whyte S, Penny C, Phelan M, Hippisley-Cox J, Majeed A. Quality of diabetes care in patients with schizophrenia and bipolar disorder: cross-sectional study. *Diabet Med [Internet]*. 2007 Dec 1 [cited 2020 Nov 5];24(12):1442–8. Available from: <http://doi.wiley.com/10.1111/j.1464-5491.2007.02324.x>

16. Yarborough BJH, Perrin NA, Stumbo SP, Muench J, Green CA. Preventive Service Use Among People With and Without Serious Mental Illnesses. *Am J Prev Med*. 2018;
17. Bresee L, Tonelli M, Manns B, Hemmelgarn B. Temporal trends in incidence of acute myocardial infarction and revascularization in people with and without mental illness. *Circulation*. 2012;125(10):25.
18. Briskman I, Bar G, Boaz M, Shargorodsky M. Impact of co-morbid mental illness on the diagnosis and management of patients hospitalized for medical conditions in a general hospital. *Int J Psychiatry Med* [Internet]. 2012 Jan 1 [cited 2020 Oct 29];43(4):339–48. Available from: <http://journals.sagepub.com/doi/10.2190/PM.43.4.d>
19. Bruggeman R. Routine outcome monitoring: somatic screening from the onset: necessity and organisation. *Early Interv Psychiatry*. 2010;4.
20. Coblenz P, Leickly E, Chwastiak L, Cristofalo MA, Ries RK, McDonell MG. Schizophrenia and metabolic syndrome in rural communities: Understanding barriers and improving care. *J Rural Ment Heal*. 2015;
21. Cohen D. Increased metabolic and cardiovascular morbidity in patients with schizophrenia: recommendation for diagnoses and treatment. *Ann Gen Psychiatry*. 2010;
22. Davidson M. Risk of cardiovascular disease and sudden death in schizophrenia. *J Clin Psychiatry*. 2002;63 Suppl 9(suppl 9):5–11.
23. do Couto FS. Medical care and long-term treatment of patients with schizophrenia: ethical concerns. *Ann Gen Psychiatry*. 2010;
24. De Hert M. Cardiovascular disease in people with severe mental illness. *Springer Int*. 2011;261.
25. De Hert M. CS01-04 - Psychotic disorders and increased metabolic and cardiovascular morbidity in patients with schizophrenia. recommendation for diagnoses and treatment. *Eur Psychiatry*. 2012;
26. Greenwood PJ, Shiers DE. Don't just screen intervene; A quality improvement initiative to improve physical health screening of young people experiencing severe mental illness. *Ment Heal Rev J*. 2016;21(1):48–60.
27. Hodgson RE. Access to healthcare, screening and physical health. *Early Interv Psychiatry*. 2010;
28. Hughes S, Dennison Himmelfarb CR. Cardiovascular risk reduction in patients with severe mental illness. *J Cardiovasc Nurs*. 2011;26(5):349–50.
29. Kalra L, De Havenon A. Mental illness, implicit attitudes, and disparity of carotid revascularization after stroke. *Neurology*. 2019;92(22):1033–4.
30. Kaur G, Schulman-Marcus J. The Challenge of Myocardial Infarction in Patients With Mental Illness. *Can J Cardiol*. 2019;35(7):797–8.
31. Lambert TJR, Newcomer JW. Are the cardiometabolic complications of schizophrenia still neglected? Barriers to care. *Med J Aust*. 2009;
32. Li Y, Glance LG, Cai X, Mukamel DB. Are patients with coexisting mental disorders more likely to receive CABG surgery from low-quality cardiac surgeons?: The experience in New York state. *Med Care*. 2007;45(7):587–93.
33. Nemcek MA, Austin EN. A psychiatric-cardiac case: Analysis for education and clinical practice. *Issues Ment Health Nurs*. 2009;

34. Newcomer JW. Metabolic syndrome and mental illness. *Am J Manag Care*. 2007;
35. Newcomer J. Long-term morbidity and mortality considerations in the treatment of bipolar disorder. *Eur Neuropsychopharmacol*. 2008;
36. Pope WS. Another face of health care disparity: Stigma of illness. *J Psychosoc Nurs Ment Health Serv*. 2011;
37. Tylee A. Depression in primary care. *J Affect Disord*. 2010;122.
38. Albus C. Psychological and social factors in coronary heart disease. *Annals of Medicine*. 2010.
39. Grace SL, Gravely-Witte S, Bruhal J, Monette G, Suskin N, Higginson L, et al. Contribution of patient and physician factors to cardiac rehabilitation enrollment: A prospective multilevel study. *Eur J Prev Cardiol*. 2008;
40. L'Italien GJ. Double jeopardy for the mentally ill: Higher cardiovascular risk and reduced frequency of certain interventional procedures. *Future Cardiol*. 2007;
41. Moulin S, Leys D. Stroke occurring in patients with cognitive impairment or dementia. *Arq Neuropsiquiatr*. 2017;
42. Shanks LC, Moore SM, Zeller RA. Predictors of cardiac rehabilitation initiation. *Rehabil Nurs*. 2007;
43. Srivastava P, Butler J, Shroyer AL, Lacey M, Parikh PB. Impact of Depressive Disorder on Access and Quality of Care in Veterans With Prevalent Cardiovascular Disease. *Am J Cardiol*. 2018;121(12):1629–33.
44. Vahia I V., Diwan S, Bankole AO, Kehn M, Nurhussein M, Ramirez P, et al. Adequacy of medical treatment among older persons with schizophrenia. *Psychiatr Serv [Internet]*. 2008 Aug [cited 2020 Oct 28];59(8):853–9. Available from: <http://psychiatryonline.org/doi/abs/10.1176/ps.2008.59.8.853>
45. Barra M, Evensen GSH, Valeberg BT. Cues and clues predicting presence of symptoms of depression in stroke survivors. *J Clin Nurs*. 2017;
46. Coventry PA, Lovell K, Dickens C, Bower P, Chew-Graham C, Cherrington A, et al. Collaborative Interventions for Circulation and Depression (COINCIDE): Study protocol for a cluster randomized controlled trial of collaborative care for depression in people with diabetes and/or coronary heart disease. *Trials*. 2012;13.
47. Dickson A, White J, Magin P, Attia J, Sturm J, Carter G, et al. Exploring the experience of psychological morbidity and service access in community dwelling stroke survivors: A qualitative follow up study. *Int J Stroke*. 2013;
48. Hart S, Morris R. Screening for depression after stroke: An exploration of professionals' compliance with guidelines. *Clin Rehabil*. 2008;
49. Kim SY, Kim MW. Clinical feasibility and usefulness of three depression scales in acute stroke patients. *J Neurol Sci*. 2013;
50. Lacey EA, Musgrave RJ, Freeman J V., Tod AM, Scott P. Psychological morbidity after myocardial infarction in an area of deprivation in the UK: Evaluation of a self-help package. *Eur J Cardiovasc Nurs*. 2004;
51. Messerli-Bürge N, Barth J, Berger T. The InterHerz project - a web-based psychological treatment for cardiac patients with depression: Study protocol of a randomized controlled trial. *Trials*. 2012;

52. Schuster JM, Belnap BH, Roth LH, Rollman BL. The Checklist Manifesto in action: Integrating depression treatment into routine cardiac care. *General Hospital Psychiatry*. 2016.
53. Ski CF, Worrall-Carter L, Cameron J, Castle DJ, Rahman MA, Thompson DR. Depression screening and referral in cardiac wards: A 12-month patient trajectory. *Eur J Cardiovasc Nurs*. 2017;
54. Smolderen KG, Buchanan DM, Gosch K, Whooley M, Chan PS, Vaccarino V, et al. Depression Treatment and 1-Year Mortality after Acute Myocardial Infarction: Insights from the TRIUMPH Registry (Translational Research Investigating Underlying Disparities in Acute Myocardial Infarction Patients' Health Status). *Circulation*. 2017;135(18):1681–9.
55. Stewart JC, Perkins AJ, Callahan CM. Effect of collaborative care for depression on risk of cardiovascular events: Data from the IMPACT randomized controlled trial. *Psychosom Med*. 2014;
56. Sundquist K, Chang BP, Parsons F, Dalrymple N, Edmondson D, Sumner JA. Treatment rates for PTSD and depression in recently hospitalized cardiac patients. *J Psychosom Res*. 2016;
57. Towers S, White J, Turner A, Mavratzakis A, Hambridge J. Electronic screening for depression in stroke patients: A qualitative study of doctor and patient perceptions of acceptability. *Int J Stroke*. 2011;
58. Hennekens CH. Increasing global burden of cardiovascular disease in general populations and patients with schizophrenia. *J Clin Psychiatry*. 2007;
59. Mitchell AJ, Malone D, Doebbeling CC. Quality of medical care for people with and without comorbid mental illness and substance misuse: Systematic review of comparative studies. *British Journal of Psychiatry*. 2009.
60. Mitchell AJ, Lord O. Do deficits in cardiac care influence high mortality rates in schizophrenia? A systematic review and pooled analysis. *Journal of psychopharmacology (Oxford, England)*. 2010.
61. Mitchell AJ, Lawrence D. Revascularisation and mortality rates following acute coronary syndromes in people with severe mental illness: Comparative meta-analysis. *British Journal of Psychiatry*. 2011.
62. Byrd JB, Powers JD, Magid DJ, Tavel HM, Schmittiel JA, O'Connor PJ, et al. Detection and recognition of hypertension in anxious and depressed patients. *J Hypertens [Internet]*. 2012 [cited 2020 Nov 5];30(12):2293–8. Available from: <https://pubmed.ncbi.nlm.nih.gov/23032145/>
63. Castillo-Sánchez M, Fàbregas-Escurriola M, Bergè-Baquero D, Fernández-SanMartín M, Goday-Arno A. Screening of cardiovascular risk factors in patients with schizophrenia and patients treated with antipsychotic drugs: are we equally exhaustive as with the general population? *Clin Exp Hypertens [Internet]*. 2017 Jul 4 [cited 2020 Oct 28];39(5):441–7. Available from: <https://www.tandfonline.com/doi/abs/10.1080/10641963.2016.1267200>
64. Hardy S, Hinks P, Gray R. Screening for cardiovascular risk in patients with severe mental illness in primary care: A comparison with patients with diabetes. *J Ment Heal [Internet]*. 2013 Feb [cited 2020 Nov 8];22(1):42–50. Available from: <https://pubmed.ncbi.nlm.nih.gov/23343046/>
65. Kaplowitz RA, Scranton RE, Gagnon DR, Cantillon C, Levenson JW, Sesso HD, et al. Health care utilization and receipt of cholesterol testing by veterans with and those without mental illness. In: *General Hospital Psychiatry*. Elsevier; 2006. p. 137–44.
66. Kilbourne AM, Welsh D, McCarthy JF, Post EP, Blow FC. Quality of care for cardiovascular disease-related conditions in patients with and without mental disorders. *J Gen Intern Med*. 2008;23(10):1628–33.

67. Lack D, Holt RIG, Baldwin DS. Poor monitoring of physical health in patients referred to a mood disorders service. *Ther Adv Psychopharmacol* [Internet]. 2014 Nov 27;5(1):22–5. Available from: <https://doi.org/10.1177/2045125314560734>
68. Osborn DPJ, Baio G, Walters K, Petersen I, Limburg H, Raine R, et al. Inequalities in the provision of cardiovascular screening to people with severe mental illnesses in primary care. Cohort study in the United Kingdom THIN Primary Care Database 2000–2007. *Schizophr Res*. 2011;129(2–3):104–10.
69. Blackburn R, Osborn D, Walters K, Nazareth I, Petersen I. Statin prescribing for prevention of cardiovascular disease amongst people with severe mental illness: Cohort study in UK primary care. *Schizophr Res*. 2018;192:219–25.
70. Bresee LC, Majumdar SR, Patten SB, Johnson JA. Diabetes, cardiovascular disease, and health care use in people with and without schizophrenia. *Eur Psychiatry*. 2011;26(5):327–32.
71. Ritchie S, Muldoon L. Cardiovascular preventive care for patients with serious mental illness. *Can Fam Physician* [Internet]. 2017 Nov 1;63(11):e483 LP-e487. Available from: <http://www.cfp.ca/content/63/11/e483.abstract>
72. Abrams TE, Vaughan-Sarrazin M, Rosenthal GE. Psychiatric Comorbidity and Mortality After Acute Myocardial Infarction. *Circ Cardiovasc Qual Outcomes* [Internet]. 2009 May [cited 2020 Oct 26];2(3):213–20. Available from: <https://www.ahajournals.org/doi/10.1161/CIRCOUTCOMES.108.829143>
73. Attar R, Berg Johansen M, Valentin JB, Aagaard J, Jensen SE. Treatment following myocardial infarction in patients with schizophrenia. McKenna PJ, editor. *PLoS One* [Internet]. 2017 Dec 13 [cited 2020 Oct 28];12(12):e0189289. Available from: <https://dx.plos.org/10.1371/journal.pone.0189289>
74. Attar R, Jensen SE, Nielsen RE, Polcwiartek C, Andell P, Pedersen CT, et al. Time Trends in the Use of Coronary Procedures, Guideline-Based Therapy, and All-Cause Mortality following the Acute Coronary Syndrome in Patients with Schizophrenia. *Cardiology* [Internet]. 2020;145(7):401–9. Available from: <https://www.karger.com/DOI/10.1159/000507044>
75. Azevedo Da Silva M, Lemogne C, Melchior M, Zins M, Van Der Waerden J, Consoli SM, et al. Excess non-psychiatric hospitalizations among employees with mental disorders: a 10-year prospective study of the GAZEL cohort. *Acta Psychiatr Scand* [Internet]. 2015 Apr 7 [cited 2020 Oct 26];131(4):307–17. Available from: <https://onlinelibrary.wiley.com/doi/10.1111/acps.12341>
76. Barcella CA, Mohr GH, Kragholm KH, Gerds TA, Jensen SE, Polcwiartek C, et al. Out-of-Hospital Cardiac Arrest in Patients With and Without Psychiatric Disorders: Differences in Use of Coronary Angiography, Coronary Revascularization, and Implantable Cardioverter-Defibrillator and Survival. *J Am Heart Assoc* [Internet]. 2019 Aug 20 [cited 2020 Oct 26];8(16). Available from: <https://www.ahajournals.org/doi/10.1161/JAHA.119.012708>
77. Blecker S, Zhang Y, Ford DE, Guallar E, dosReis S, Steinwachs DM, et al. Quality of care for heart failure among disabled Medicaid recipients with and without severe mental illness. *Gen Hosp Psychiatry*. 2010 May 1;32(3):255–61.
78. Bongiorno DM, Daumit GL, Gottesman RF, Faigle R. Comorbid Psychiatric Disease Is Associated With Lower Rates of Thrombolysis in Ischemic Stroke. *Stroke* [Internet]. 2018/01/26. 2018 Mar;49(3):738–40. Available from: <https://pubmed.ncbi.nlm.nih.gov/29374106>
79. Bongiorno DM, Daumit GL, Gottesman RF, Faigle R. Patients with stroke and psychiatric comorbidities have lower carotid revascularization rates. *Neurology* [Internet]. 2019 May 28 [cited 2020 Oct

26];92(22):E2514–21. Available from: <https://n.neurology.org/content/92/22/e2514>

80. Bresee LC, Majumdar SR, Patten SB, Johnson JA. Utilization of general and specialized cardiac care by people with schizophrenia. *Psychiatr Serv* [Internet]. 2012 Mar 1 [cited 2020 Oct 28];63(3):237–42. Available from: <http://psychiatryonline.org/doi/abs/10.1176/appi.ps.201000363>
81. Campi TR, George S, Villacís D, Ward-Peterson M, Barengo NC, Zevallos JC. Effect of charted mental illness on reperfusion therapy in hospitalized patients with an acute myocardial infarction in Florida. *Medicine (Baltimore)* [Internet]. 2017 Aug 1 [cited 2020 Oct 26];96(34):e7788. Available from: <http://journals.lww.com/00005792-201708250-00020>
82. Chung Chang W, Kwun Nam Chan J, Sau Man Wong C, Chi Fai Or P, Siu Han Hai J. S83. MORTALITY, REVASCULARIZATION AND CARDIOPROTECTIVE PHARMACOTHERAPY AFTER ACUTE CORONARY SYNDROME IN PATIENTS WITH PSYCHOTIC DISORDERS: A POPULATION-BASED COHORT STUDY. *Schizophr Bull* [Internet]. 2020 May 18 [cited 2020 Oct 26];46(Supplement\_1):S65–6. Available from: </pmc/articles/PMC7234756/?report=abstract>
83. Desai MM, Rosenheck RA, Druss BG, Perlin JB. MENTAL DISORDERS AND QUALITY OF CARE AMONG POSTACUTE MYOCARDIAL INFARCTION OUTPATIENTS. *J Nerv Ment Dis* [Internet]. 2002 Jan 1 [cited 2020 Oct 26];190(1):51–3. Available from: <http://journals.lww.com/00005053-200201000-00014>
84. Druss BG, Bradford DW, Rosenheck RA, Radford MJ, Krumholz HM. Mental disorders and use of cardiovascular procedures after myocardial infarction. *J Am Med Assoc* [Internet]. 2000 Jan 26 [cited 2020 Oct 26];283(4):506–11. Available from: <https://jamanetwork.com/>
85. Druss BG, Bradford WD, Rosenheck RA, Radford MJ, Krumholz HM. Quality of medical care and excess mortality in older patients with mental disorders. *Arch Gen Psychiatry* [Internet]. 2001 [cited 2020 Oct 26];58(6):565–72. Available from: </record/2001-01091-006>
86. Gal G, Munitz H, Levav I. Health care disparities among persons with comorbid schizophrenia and cardiovascular disease: A case-control epidemiological study. *Epidemiol Psychiatr Sci* [Internet]. 2016 Dec 1 [cited 2020 Oct 28];25(6):541–7. Available from: </core/journals/epidemiology-and-psychiatric-sciences/article/health-care-disparities-among-persons-with-comorbid-schizophrenia-and-cardiovascular-disease-a-casecontrol-epidemiological-study/3AA1EA78DFA11E2594A91FDBCD537DBE>
87. Gal G, Munitz H, Levav I. Health Care and Mortality among Persons with Severe Mental Illness: A Case-Control Epidemiological Study. *Can J Psychiatry* [Internet]. 2017 Apr 1 [cited 2020 Oct 28];62(4):259–67. Available from: <https://pubmed.ncbi.nlm.nih.gov/27573257/>
88. Hauck TS, Liu N, Wijeyesundera HC, Kurdyak P. Mortality and Revascularization among Myocardial Infarction Patients with Schizophrenia: A Population-Based Cohort Study. *Can J Psychiatry* [Internet]. 2020 Jul 1 [cited 2020 Oct 26];65(7):454–62. Available from: <http://journals.sagepub.com/doi/10.1177/0706743720904845>
89. Heiberg IH, Jacobsen BK, Balteskard L, Bramness JG, Naess Ø, Ystrom E, et al. Undiagnosed cardiovascular disease prior to cardiovascular death in individuals with severe mental illness. *Acta Psychiatr Scand* [Internet]. 2019/03/29. 2019 Jun;139(6):558–71. Available from: <https://pubmed.ncbi.nlm.nih.gov/30844079>
90. Heiberg IH, Nesvåg R, Balteskard L, Bramness JG, Hultman CM, Næss Ø, et al. Diagnostic tests and treatment procedures performed prior to cardiovascular death in individuals with severe mental illness. *Acta Psychiatr Scand* [Internet]. 2020 May 29 [cited 2020 Oct 26];141(5):439–51. Available from: <https://onlinelibrary.wiley.com/doi/abs/10.1111/acps.13157>

91. Hippisley-Cox J, Parker C, Coupland C, Vinogradova Y. Inequalities in the primary care of patients with coronary heart disease and serious mental health problems: A cross-sectional study. *Heart* [Internet]. 2007 Oct [cited 2020 Oct 26];93(10):1256–62. Available from: <https://pubmed.ncbi.nlm.nih.gov/17344333/>
92. Jakobsen L, Terkelsen CJ, Christiansen EH, Maeng M, Jensen LO, Veien K, et al. Severe Mental Illness and Clinical Outcome After Primary Percutaneous Coronary Intervention. *Am J Cardiol* [Internet]. 2017;120(4):550–5. Available from: <http://www.sciencedirect.com/science/article/pii/S0002914917308573>
93. Jones LE, Carney CP. Mental disorders and revascularization procedures in a commercially insured sample. *Psychosom Med*. 2005;
94. Kisely S, Smith M, Lawrence D, Cox M, Campbell LA, Maaten S. Inequitable access for mentally ill patients to some medically necessary procedures. *CMAJ* [Internet]. 2007 Mar 13 [cited 2020 Oct 26];176(6):779–84. Available from: <https://www.cmaj.ca/content/176/6/779>
95. Kisely S, Campbell LA, Wang Y. Treatment of ischaemic heart disease and stroke in individuals with psychosis under universal healthcare. *Br J Psychiatry* [Internet]. 2009 [cited 2020 Oct 26];195(6):545–50. Available from: [www.phru.dal.ca/about/](http://www.phru.dal.ca/about/)
96. Kugathasan P, Horsdal HT, Aagaard J, Jensen SE, Laursen TM, Nielsen RE. Association of Secondary Preventive Cardiovascular Treatment after Myocardial Infarction with Mortality among Patients with Schizophrenia. *JAMA Psychiatry* [Internet]. 2018 Dec 1 [cited 2020 Nov 8];75(12):1261–9. Available from: <https://jamanetwork.com/>
97. Kurdyak P, Vigod S, Calzavara A, Wodchis WP. High mortality and low access to care following incident acute myocardial infarction in individuals with schizophrenia. *Schizophr Res* [Internet]. 2012 Dec [cited 2020 Oct 26];142(1–3):52–7. Available from: <https://pubmed.ncbi.nlm.nih.gov/23021899/>
98. Lahti M, Tiihonen J, Wildgust H, Beary M, Hodgson R, Kajantie E, et al. Cardiovascular morbidity, mortality and pharmacotherapy in patients with schizophrenia. *Psychol Med* [Internet]. 2012 Nov [cited 2020 Oct 26];42(11):2275–85. Available from: <https://pubmed.ncbi.nlm.nih.gov/22405504/>
99. Laursen TM, Munk-Olsen T, Agerbo E, Gasse C, Mortensen PB. Somatic hospital contacts, invasive cardiac procedures, and mortality from heart disease in patients with severe mental disorder. *Arch Gen Psychiatry* [Internet]. 2009 Jul 1 [cited 2020 Oct 26];66(7):713–20. Available from: <https://jamanetwork.com/journals/jamapsychiatry/fullarticle/483122>
100. Laursen TM, Mortensen PB, Maccabe JH, Cohen D, Gasse C. Cardiovascular drug use and mortality in patients with schizophrenia or bipolar disorder: A Danish population-based study. *Psychol Med* [Internet]. 2014 [cited 2020 Nov 8];44(8):1625–37. Available from: <https://pubmed.ncbi.nlm.nih.gov/24246137/>
101. Lawrence DM, Holman CDAJ, Jablensky A V., Hobbs MST. Death rate from ischaemic heart disease in Western Australian psychiatric patients 1980-1998. *Br J Psychiatry* [Internet]. 2003 Jan 1 [cited 2020 Oct 26];182(JAN.):31–6. Available from: <https://www.cambridge.org/core>.
102. Li Y, Glance LG, Lyness JM, Cram P, Cai X, Mukamel DB. Mental Illness, Access to Hospitals with Invasive Cardiac Services, and Receipt of Cardiac Procedures by Medicare Acute Myocardial Infarction Patients. *Health Serv Res* [Internet]. 2013 Jun 1 [cited 2020 Oct 26];48(3):1076–95. Available from: <http://doi.wiley.com/10.1111/1475-6773.12010>
103. Manderbacka K, Arffman M, Sund R, Haukka J, Keskimäki I, Wahlbeck K. How does a history of



psychiatric hospital care influence access to coronary care: A cohort study [Internet]. Vol. 2, *BMJ Open*. British Medical Journal Publishing Group; 2012 [cited 2020 Nov 5]. p. e000831. Available from: <http://dx>.

104. Mansuri Z, Patel A, Mansuri U, Goswami R, Nadkarni G, Mahuwala Z, et al. Burden and Outcomes of Acute Hemorrhagic Stroke in Patients with Major Depression. *Ann Neurol*. 2016;80.
105. Mansuri Z, Patel A, Nadkarni G, Mahuwala Z, Mehta T, Mansuri U, et al. Burden and Outcomes of Acute Hemorrhagic Stroke in Patients with Psychosis. *Ann Neurol*. 2016;80.
106. McGinty EE, Blasco-Colmenares E, Zhang Y, dosReis SC, Ford DE, Steinwachs DM, et al. Post-myocardial-infarction quality of care among disabled Medicaid beneficiaries with and without serious mental illness. *Gen Hosp Psychiatry*. 2012 Sep 1;34(5):493–9.
107. Mohamed MO, Rashid M, Farooq S, Siddiqui N, Parwani P, Shiers D, et al. Acute Myocardial Infarction in Severe Mental Illness: Prevalence, Clinical Outcomes, and Process of Care in U.S. Hospitalizations. *Can J Cardiol* [Internet]. 2019 Jul 1 [cited 2020 Oct 26];35(7):821–30. Available from: <https://pubmed.ncbi.nlm.nih.gov/31292080/>
108. Murugiah K, Kumar G, Deshmukh A, Sachdeva R, Mehta J. SCHIZOPHRENIA AND USE OF REVASCULARIZATION PROCEDURES AFTER ACUTE MYOCARDIAL INFARCTION. *J Am Coll Cardiol* [Internet]. 2012 Mar 27 [cited 2020 Oct 26];59(13):E1898. Available from: [https://www.onlinejacc.org/content/59/13\\_Supplement/E1898](https://www.onlinejacc.org/content/59/13_Supplement/E1898)
109. Petersen LA, Normand S-LT, Druss BG, Rosenheck RA. Process of Care and Outcome after Acute Myocardial Infarction for Patients with Mental Illness in the VA Health Care System: Are There Disparities? *Health Serv Res*. 2003;
110. Plomondon ME, Ho PM, Wang L, Greiner GT, Shore JH, Sakai JT, et al. Severe mental illness and mortality of hospitalized ACS patients in the VHA. *BMC Health Serv Res* [Internet]. 2007 Dec 18 [cited 2020 Oct 26];7(1):146. Available from: <https://bmchealthservres.biomedcentral.com/articles/10.1186/1472-6963-7-146>
111. Rathore SS, Wang Y, Druss BG, Masoudi FA, Krumholz HM. Mental disorders, quality of care, and outcomes among older patients hospitalized with heart failure: An analysis of the national heart failure project. *Arch Gen Psychiatry* [Internet]. 2008 Dec 1 [cited 2020 Oct 26];65(12):1402–8. Available from: <https://jamanetwork.com/journals/jamapsychiatry/fullarticle/482907>
112. Schulman-Marcus J, Goyal P, Swaminathan R, Singh H, Minutello R, Bergman G, et al. DISPARITIES IN REVASCULARIZATION FOR ST-ELEVATION MYOCARDIAL INFARCTION PERSIST FOR PATIENTS WITH SEVERE MENTAL ILLNESS. *J Am Coll Cardiol* [Internet]. 2016 Apr 5 [cited 2020 Oct 26];67(13):656. Available from: [https://www.onlinejacc.org/content/67/13\\_Supplement/656](https://www.onlinejacc.org/content/67/13_Supplement/656)
113. Smith DJ, Martin D, McLean G, Langan J, Guthrie B, Mercer SW. Multimorbidity in bipolar disorder and undertreatment of cardiovascular disease: A cross sectional study. *BMC Med* [Internet]. 2013 Dec 23 [cited 2020 Oct 26];11(1):263. Available from: <http://bmcmmedicine.biomedcentral.com/articles/10.1186/1741-7015-11-263>
114. Swardfager W, Herrmann N, Marzolini S, Saleem M, Farber SB, Kiss A, et al. Major depressive disorder predicts completion, adherence, and outcomes in cardiac rehabilitation: A prospective cohort study of 195 patients with coronary artery disease. *J Clin Psychiatry* [Internet]. 2011 [cited 2020 Oct 26];72(9):1181–8. Available from: <https://pubmed.ncbi.nlm.nih.gov/21208573/>
115. Swildens W, Termorshuizen F, de Ridder A, Smeets H, Engelhard IM. Somatic Care with a Psychotic

Disorder. Lower Somatic Health Care Utilization of Patients with a Psychotic Disorder Compared to Other Patient Groups and to Controls Without a Psychiatric Diagnosis. *Adm Policy Ment Heal Ment Heal Serv Res* [Internet]. 2016 Sep 1 [cited 2020 Oct 29];43(5):650–62. Available from: <https://link.springer.com/article/10.1007/s10488-015-0679-0>

116. Woodhead C, Ashworth M, Hotopf M, Schofield P, Stewart RJ, Henderson MJ, et al. Cardiovascular disease treatment among patients with severe mental illness: A data linkage study between primary and secondary care. *Br J Gen Pract*. 2016;
117. Wu SI, Chen SC, Juang JJM, Fang CK, Liu SI, Sun FJ, et al. Diagnostic procedures, revascularization, and inpatient mortality after acute myocardial infarction in patients with schizophrenia and bipolar disorder. *Psychosom Med* [Internet]. 2013 [cited 2020 Oct 26];75(1):52–9. Available from: <https://pubmed.ncbi.nlm.nih.gov/23213265/>
118. Young JK, Foster DA, Shander D, Druss BG. Cardiovascular procedures in patients with mental disorders [1] (multiple letters) [Internet]. Vol. 283, *Journal of the American Medical Association*. American Medical Association; 2000 [cited 2020 Oct 26]. p. 3198–9. Available from: <https://jamanetwork.com/journals/jama/fullarticle/1030822>
119. Ottawa Hospital Research Institute [Internet]. The Newcastle-Ottawa Scale (NOS) for assessing the quality of nonrandomised studies in meta-analyses GA Wells, B Shea, D O’Connell, J Peterson, V Welch, M Losos, P Tugwell. [cited 2019 Dec 21]. Available from: [http://www.ohri.ca/programs/clinical\\_epidemiology/oxford.asp](http://www.ohri.ca/programs/clinical_epidemiology/oxford.asp)
